# Supplementary material for: Time-Trends of Drug-Drug Interactions among Elderly Outpatients in the Piedmont Region (Italy): A Population-Based Study
Source: MDPI journal article supplement (doi:10.3390/ijerph19127353), 2022-06-15
Supplement: s1 [file s1]

## Supplementary material

**Table S1** – List of ATC codes used to identify the DDIs

| Treatment                                                                      | ATC code                                     |
|--------------------------------------------------------------------------------|----------------------------------------------|
| antidiabetics                                                                  | A10*                                         |
| beta-blocking agents alone or in combination with other antihypertensive drugs | C07*                                         |
| fluoroquinolones                                                               | J01MA*                                       |
| ACEIs/ARBs alone or in combination with other antihypertensive drugs           | C09*                                         |
| NSAIDs                                                                         | M01A*                                        |
| potassium-sparing agents                                                       | C03D*                                        |
| ACEIs/ARBs + diuretics                                                         | C03*, C07B*, C07C*,C07D*,C09BA*, C09DA*      |
| diuretics alone or in combination with other antihypertensive drugs            | C03*, C07B*, C07C*,C07D*,C09A*,C09B*, C09DA* |
| SSRIs                                                                          | N06AB*                                       |
| NSAIDs/ASA                                                                     | M01A*, B01AC06                               |
| vitamin K antagonists                                                          | B01AA*                                       |
| PPIs                                                                           | A02BC*                                       |
| statins alone or in combination with other lipid lowering drugs                | C10AA*, C10BA*                               |
| clopidogrel                                                                    | B01AC04                                      |
| corticosteroids for systemic use                                               | H02*                                         |

**Figure S1** – Trend in the prevalence of other DDIs, overall and by sex. 2013-2019, Piedmont region

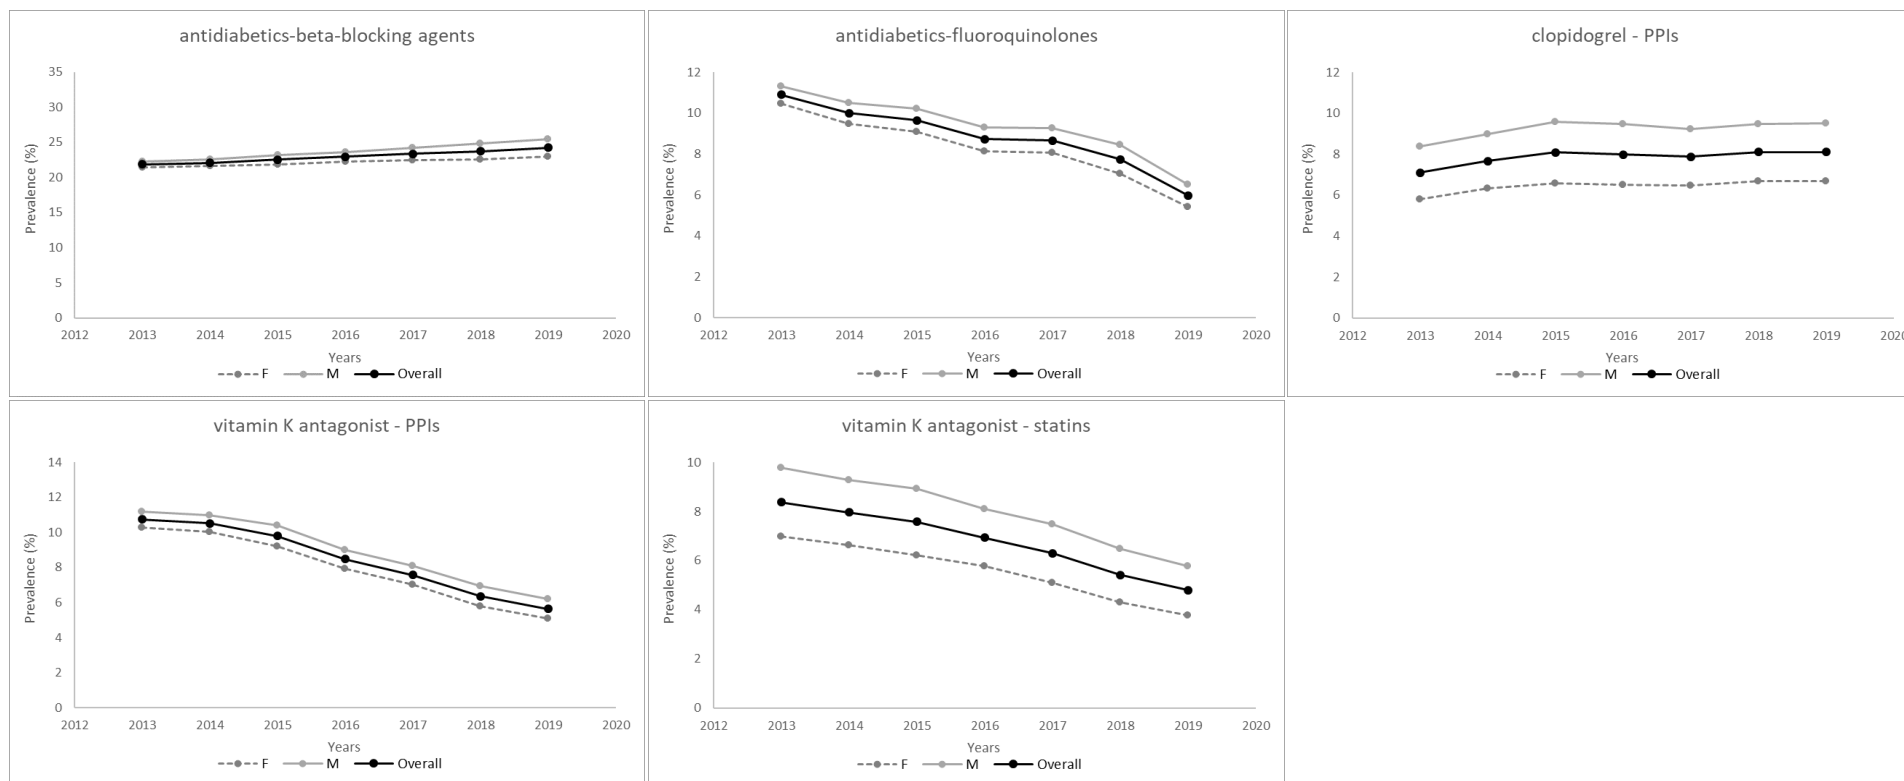

**Table S2** Prevalence of **other DDIs** by year stratified by age classes. 2013-2019, Piedmont region.

|                                           |             | 2013  | 2014  | 2015  | 2016  | 2017  | 2018  | 2019  |
|-------------------------------------------|-------------|-------|-------|-------|-------|-------|-------|-------|
| Age group                                 |             | %     | %     | %     | %     | %     | %     | %     |
| antidiabetics+<br>beta-blocking<br>agents | 65-69 years | 27.94 | 27.79 | 28.27 | 28.43 | 28.57 | 28.99 | 29.12 |
|                                           | 70-74 years | 25.41 | 25.87 | 26.30 | 26.74 | 27.01 | 27.28 | 27.91 |
|                                           | 75-79 years | 22.98 | 23.47 | 23.59 | 24.25 | 24.54 | 24.81 | 25.55 |
|                                           | 80-84 years | 18.97 | 19.60 | 20.58 | 20.84 | 21.56 | 22.27 | 22.76 |
|                                           | ≥85 years   | 14.18 | 14.35 | 15.01 | 15.86 | 16.72 | 17.37 | 17.91 |
| antidiabetics +<br>fluoroquinolones       | 65-69 years | 12.20 | 11.68 | 11.12 | 9.85  | 9.87  | 8.72  | 6.63  |
|                                           | 70-74 years | 12.16 | 11.04 | 10.50 | 9.77  | 9.72  | 8.91  | 7.05  |
|                                           | 75-79 years | 11.19 | 10.37 | 10.16 | 9.16  | 8.89  | 8.27  | 6.33  |
|                                           | 80-84 years | 10.16 | 9.37  | 9.11  | 8.26  | 8.18  | 7.19  | 5.62  |
|                                           | ≥85 years   | 8.78  | 7.72  | 7.61  | 6.91  | 7.08  | 6.04  | 4.53  |
| clopidogrel +<br>PPIs                     | 65-69 years | 6.97  | 6.87  | 7.22  | 7.18  | 6.64  | 7.19  | 7.11  |
|                                           | 70-74 years | 6.90  | 7.43  | 7.64  | 7.45  | 7.14  | 7.56  | 7.65  |
|                                           | 75-79 years | 7.01  | 7.66  | 8.08  | 8.01  | 8.01  | 8.01  | 8.09  |
|                                           | 80-84 years | 7.42  | 8.10  | 8.56  | 8.29  | 8.16  | 8.60  | 8.43  |
|                                           | ≥85 years   | 7.13  | 8.10  | 8.73  | 8.76  | 8.94  | 8.75  | 8.85  |
| vitamin K<br>antagonists + PPIs           | 65-69 years | 7.03  | 7.08  | 6.68  | 5.35  | 4.87  | 4.21  | 3.74  |
|                                           | 70-74 years | 9.46  | 8.82  | 8.25  | 7.12  | 6.03  | 5.08  | 4.45  |
|                                           | 75-79 years | 11.57 | 11.10 | 10.19 | 8.74  | 7.60  | 6.24  | 5.64  |
|                                           | 80-84 years | 13.40 | 13.10 | 11.98 | 10.44 | 9.16  | 7.55  | 6.44  |
|                                           | ≥85 years   | 11.10 | 11.38 | 10.85 | 9.63  | 9.14  | 7.79  | 7.06  |
| vitamin K<br>antagonists +<br>statins     | 65-69 years | 6.72  | 6.11  | 6.06  | 5.04  | 4.68  | 3.93  | 3.49  |
|                                           | 70-74 years | 8.56  | 7.92  | 7.43  | 6.69  | 5.81  | 4.88  | 4.16  |
|                                           | 75-79 years | 9.81  | 9.19  | 8.69  | 7.88  | 6.96  | 5.98  | 5.34  |
|                                           | 80-84 years | 9.71  | 9.49  | 8.76  | 8.20  | 7.64  | 6.32  | 5.52  |
|                                           | ≥85 years   | 5.92  | 6.07  | 6.16  | 5.95  | 5.64  | 5.19  | 4.78  |
